# Supplementary material for: Theoretical study of electronic and tribological properties of h-BNC2/graphene, h-BNC2/h-BN and h-BNC2/h-BNC2bilayers
Source: Royal Society of Chemistry journal article supplement (doi:10.1039/c5cp00381d), 2015-01-01

## **Theoretical study of electronic and tribological properties of $h$ - $BNC_2$ /graphene, $h$ - $BNC_2$ / $h$ -BN and $h$ - $BNC_2$ / $h$ - $BNC_2$ bilayers**

Narjes Ansari,<sup>1</sup> Fariba Nazari,<sup>1,2</sup> Francesc Illas<sup>3</sup>

<sup>1</sup>*Department of Chemistry, Institute for Advanced Studies in Basic Sciences, Zanjan 45137-66731, Iran*

<sup>2</sup>*Center of Climate Change and Global Warming, Institute for Advanced Studies in Basic Sciences, Zanjan 45137-66731, Iran*

<sup>3</sup>*Departament de Química Física & Institut de Química Teòrica i Computacional (IQTCUB), Universitat de Barcelona, C/Martí i Franquès 1, 08028 Barcelona, Spain*

**Table S1:** Cartesian coordinates of the optimized strained unit-cell of  $h$ -BNC<sub>2</sub>/graphene (*I*),  $h$ -BNC<sub>2</sub>/ $h$ -BN (*II*) and  $h$ -BNC<sub>2</sub>/ $h$ -BNC<sub>2</sub> (*III*) model systems with a fixed interlayer distance of 3.15 Å

| <i>I</i> |          |          |           | <i>II</i> |          |          |           | <i>III</i> |          |          |           |
|----------|----------|----------|-----------|-----------|----------|----------|-----------|------------|----------|----------|-----------|
| B        | 1.781494 | 1.858918 | 3.150000  | B         | 1.781427 | 1.858917 | 3.150000  | B          | 1.436828 | 1.858921 | 3.150000  |
| N        | 1.045989 | 0.619637 | 3.150000  | N         | 1.046323 | 0.619636 | 3.150000  | N          | 0.702381 | 0.619639 | 3.150000  |
| C        | 3.293453 | 1.858933 | 3.150000  | C         | 3.292796 | 1.858931 | 3.150000  | C          | 2.949602 | 1.858934 | 3.150000  |
| N        | 7.483754 | 1.858924 | 3.150000  | N         | 7.484263 | 1.858925 | 3.150000  | N          | 7.140140 | 1.858926 | 3.150000  |
| C        | 3.985193 | 0.619650 | 3.150000  | C         | 3.984770 | 0.619648 | 3.150000  | C          | 3.643546 | 0.619650 | 3.150000  |
| C        | 6.104598 | 1.858911 | 3.150000  | C         | 6.105032 | 1.858911 | 3.150000  | C          | 5.763813 | 1.858912 | 3.150000  |
| C        | 5.416613 | 0.619632 | 3.150000  | C         | 5.416515 | 0.619631 | 3.150000  | C          | 5.074352 | 0.619632 | 3.150000  |
| B        | 8.216185 | 0.619645 | 3.150000  | B         | 8.216344 | 0.619646 | 3.150000  | B          | 7.871840 | 0.619646 | 3.150000  |
| C        | 1.804543 | 1.858925 | 0.000000  | B         | 1.805675 | 1.858920 | 0.000000  | B          | 1.436828 | 1.858921 | 0.000000  |
| C        | 1.088667 | 0.619640 | 0.000000  | N         | 1.088256 | 0.619638 | 0.000000  | N          | 0.702381 | 0.619639 | 0.000000  |
| C        | 3.234111 | 1.858925 | 0.000000  | N         | 3.234017 | 1.858929 | 0.000000  | C          | 2.949602 | 1.858934 | 0.000000  |
| C        | 7.526833 | 1.858927 | 0.000000  | N         | 7.527582 | 1.858929 | 0.000000  | N          | 7.140140 | 1.858926 | 0.000000  |
| C        | 3.949662 | 0.619640 | 0.000000  | B         | 3.947966 | 0.619648 | 0.000000  | C          | 3.643546 | 0.619650 | 0.000000  |
| C        | 6.095989 | 1.858926 | 0.000000  | B         | 6.094234 | 1.858921 | 0.000000  | C          | 5.763813 | 1.858912 | 0.000000  |
| C        | 5.379310 | 0.619641 | 0.000000  | N         | 5.380289 | 0.619639 | 0.000000  | C          | 5.074352 | 0.619632 | 0.000000  |
| C        | 8.244108 | 0.619642 | 0.000000  | B         | 8.245012 | 0.619647 | 0.000000  | B          | 7.871840 | 0.619646 | 0.000000  |
| Tv       | 8.586000 | 0.000000 | 0.000000  | Tv        | 8.586000 | 0.000000 | 0.000000  | Tv         | 8.586000 | 0.000000 | 0.000000  |
| Tv       | 0.000000 | 2.478565 | 0.000000  | Tv        | 0.000000 | 2.478565 | 0.000000  | Tv         | 0.000000 | 2.478565 | 0.000000  |
| Tv       | 0.000000 | 0.000000 | 20.000000 | Tv        | 0.000000 | 0.000000 | 20.000000 | Tv         | 0.000000 | 0.000000 | 20.000000 |

**Table S2:** Cartesian coordinates of the optimized unstrained unit-cell of graphene, *h*-BN and *h*-BNC<sub>2</sub> mono-layers

| Graphene |          |          |           | <i>h</i> -BN |          |          |           | <i>h</i> -BNC <sub>2</sub> |          |          |           |
|----------|----------|----------|-----------|--------------|----------|----------|-----------|----------------------------|----------|----------|-----------|
| C        | 3.552500 | 1.845933 | 0.000000  | B            | 3.564583 | 1.883605 | 0.000000  | C                          | 3.660991 | 1.864170 | 0.000000  |
| C        | 2.842000 | 0.615311 | 0.000000  | N            | 2.839583 | 0.627868 | 0.000000  | C                          | 2.958527 | 0.621384 | 0.000000  |
| C        | 1.421000 | 0.615311 | 0.000000  | B            | 1.389583 | 0.627868 | 0.000000  | B                          | 1.428584 | 0.621400 | 0.000000  |
| C        | 0.710500 | 1.845933 | 0.000000  | N            | 0.664583 | 1.883605 | 0.000000  | N                          | 0.678730 | 1.864183 | 0.000000  |
| C        | 7.815500 | 1.845933 | 0.000000  | B            | 7.914583 | 1.883605 | 0.000000  | B                          | 7.944661 | 1.864169 | 0.000000  |
| C        | 7.105000 | 0.615311 | 0.000000  | N            | 7.189583 | 0.627868 | 0.000000  | N                          | 7.199643 | 0.621387 | 0.000000  |
| C        | 5.684000 | 0.615311 | 0.000000  | B            | 5.739583 | 0.627868 | 0.000000  | C                          | 5.806178 | 0.621405 | 0.000000  |
| C        | 4.973500 | 1.845933 | 0.000000  | N            | 5.014583 | 1.883605 | 0.000000  | C                          | 5.108176 | 1.864190 | 0.000000  |
| Tv       | 8.526000 | 0.000000 | 0.000000  | Tv           | 8.700000 | 0.000000 | 0.000000  | Tv                         | 8.696222 | 0.000000 | 0.000000  |
| Tv       | 0.000000 | 2.461244 | 0.000000  | Tv           | 0.000000 | 2.511474 | 0.000000  | Tv                         | 0.000000 | 2.485571 | 0.000000  |
| Tv       | 0.000000 | 0.000000 | 20.000000 | Tv           | 0.000000 | 0.000000 | 20.000000 | Tv                         | 0.000000 | 0.000000 | 20.000000 |

**Figure S1.-** RI landscape for interlayer sliding in bilayer a) graphene (top and side view) and b) *h*-BN.

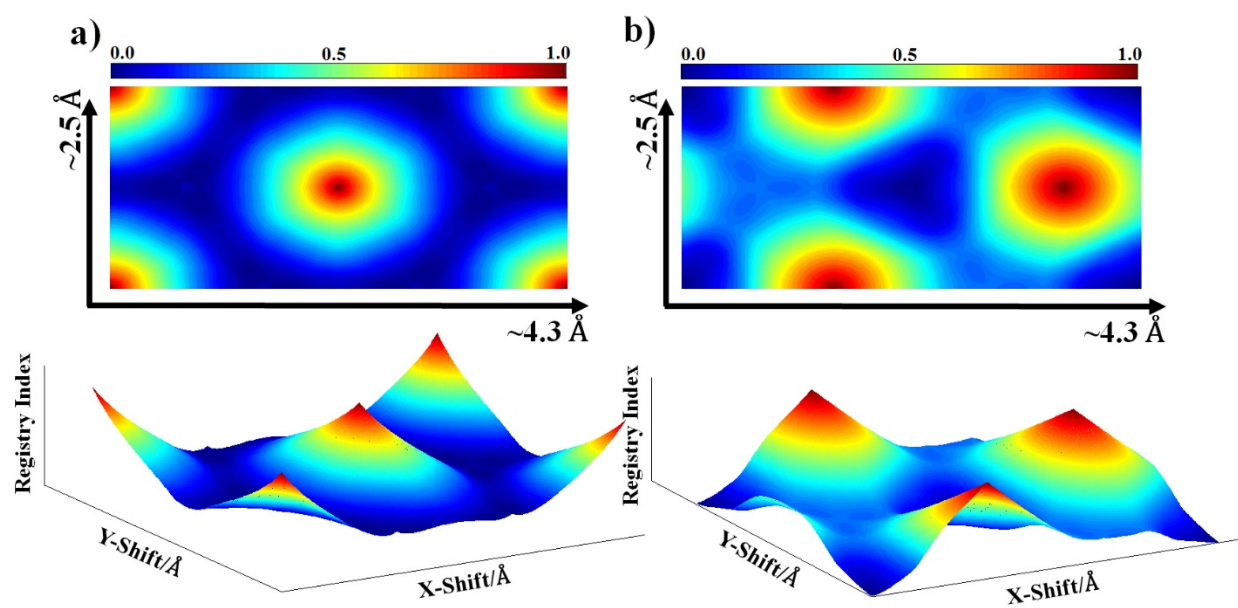

**Figure S2.-** (a) A finite square  $h$ -BNC<sub>2</sub> flake, (b) the center of mass of the flake corresponds to the origin of the coordinate system and (c) center of mass of the monolayer is exactly below the center of mass of the corresponding flake.

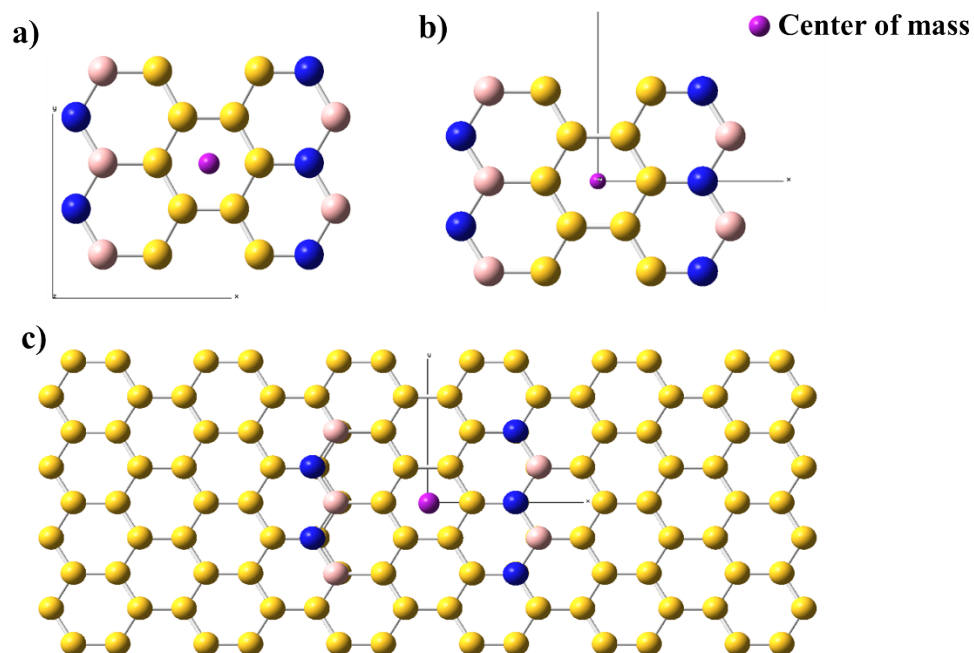

Supplement: c5cp00381d1.pdf [file c5cp00381d1.pdf]
